# Supplementary material
Source: PubMed Central journal article supplement (PMC2493287)
Supplement: NIHMS52114-supplement-Fig_1.pdf [file NIHMS52114-supplement-Fig_1.pdf]

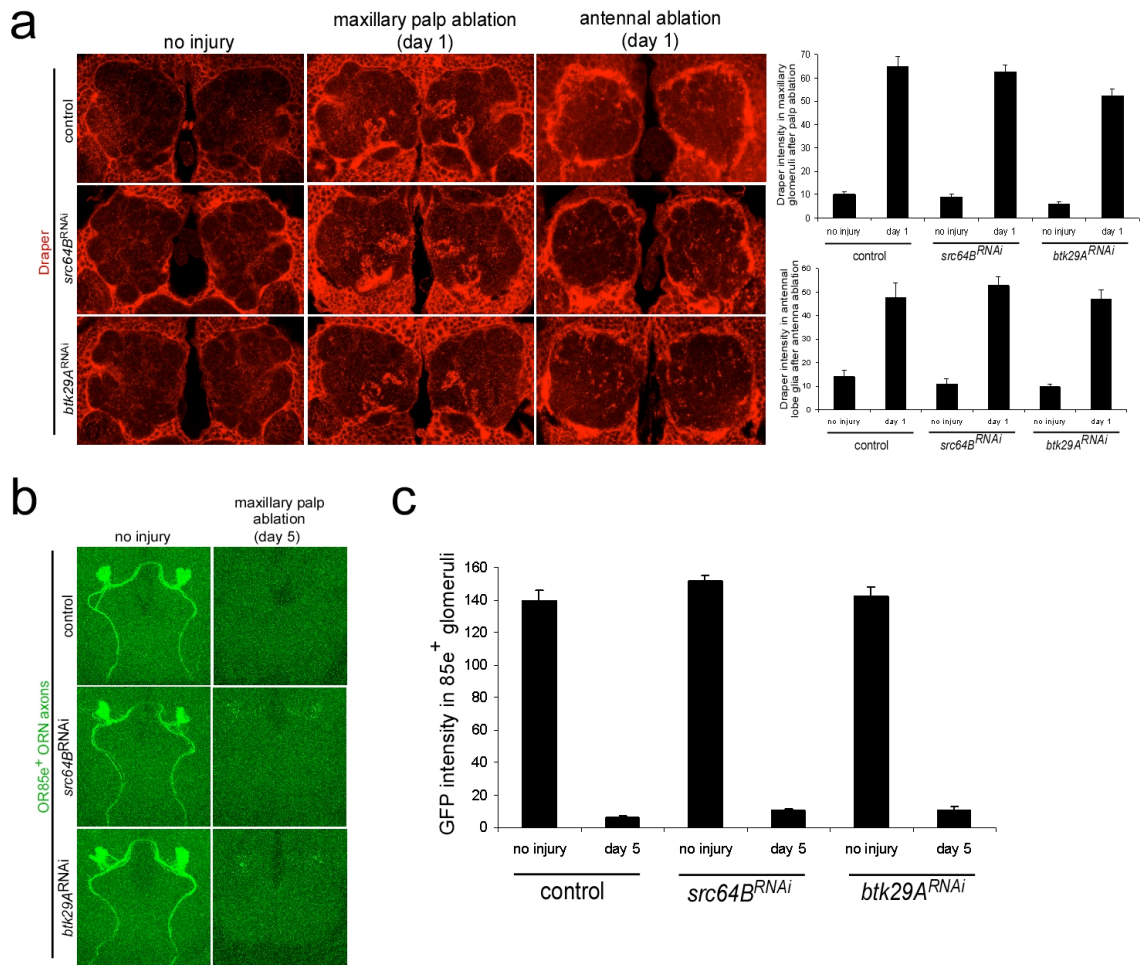

**Supplementary Figure 1. RNAi knockdown of Src64b or btk29A does not affect glial responses to axon injury or clearance of severed axons from the CNS**

**a)** Control animals (*y w*) and those with glial specific knock-down of *src64b* (*y w; repo-Gal4/UAS-src64b<sup>RNAi</sup>*) or *btk29A* (*y w; repo-Gal4/UAS-btk29a<sup>RNAi</sup>*) were assayed for injury-induced changes in glial Draper expression, and recruitment of Draper to severed axons (red). Right, quantification; error bars represent  $\pm$  S.E.M.;  $n \geq 10$ . **b)** OR85e<sup>+</sup> ORN axons were labeled with mCD8::GFP in control (*y w; OR85e-mCD8::GFP/+*) and glial *src64b<sup>RNAi</sup>* (*y w; OR85e-mCD8::GFP/+; repo-Gal4/UAS-src64b<sup>RNAi</sup>*) and *btk29A<sup>RNAi</sup>* (*y w; OR85e-mCD8::GFP/+; repo-Gal4/UAS-btk29A<sup>RNAi</sup>*) animals, maxillary palps were ablated, and clearance of severed ORN axons from the CNS was assayed with  $\alpha$ -GFP antibody stains (green) 5 days after injury. Right, quantification; error bars represent  $\pm$  S.E.M.;  $n \geq 10$ .
